# Supplementary material for: Screening for Health-Related Social Needs and Collaboration With External Partners Among US Hospitals
Source: PubMed Central journal article supplement (PMC10448297; doi:10.1001/jamanetworkopen.2023.30228), 2023-08-23
Supplement: jamanetwopen-e2330228-s002.pdf [file jamanetwopen-e2330228-s002.pdf]

## Data Sharing Statement

Ashe. Screening for Health-Related Social Needs and Collaboration With External Partners Among US Hospitals. *JAMA Netw Open*. Published August 22, 2023.  
doi:10.1001/jamanetworkopen.2023.30228

### Data

**Data available:** No
